# Supplementary material for: Metabolism-associated genome-wide epigenetic changes in bovine oocytes during early lactation
Source: PubMed Central journal article supplement (PMC7012839; doi:10.1038/s41598-020-59410-8), 2020-02-11
Supplement: 41598_2020_59410_MOESM1_ESM.pdf [file 41598_2020_59410_MOESM1_ESM.pdf]

**Metabolism-associated genome-wide epigenetic changes in bovine oocytes during early lactation**

Mikhael Poirier, Dawit Tesfaye, Tsige Hailay, Dessie Salilew Wondim, Samuel Gebremedhn, Franca Rings, Christiane Neuhoff, Karl Schellander, Michael Hoelker.

**a**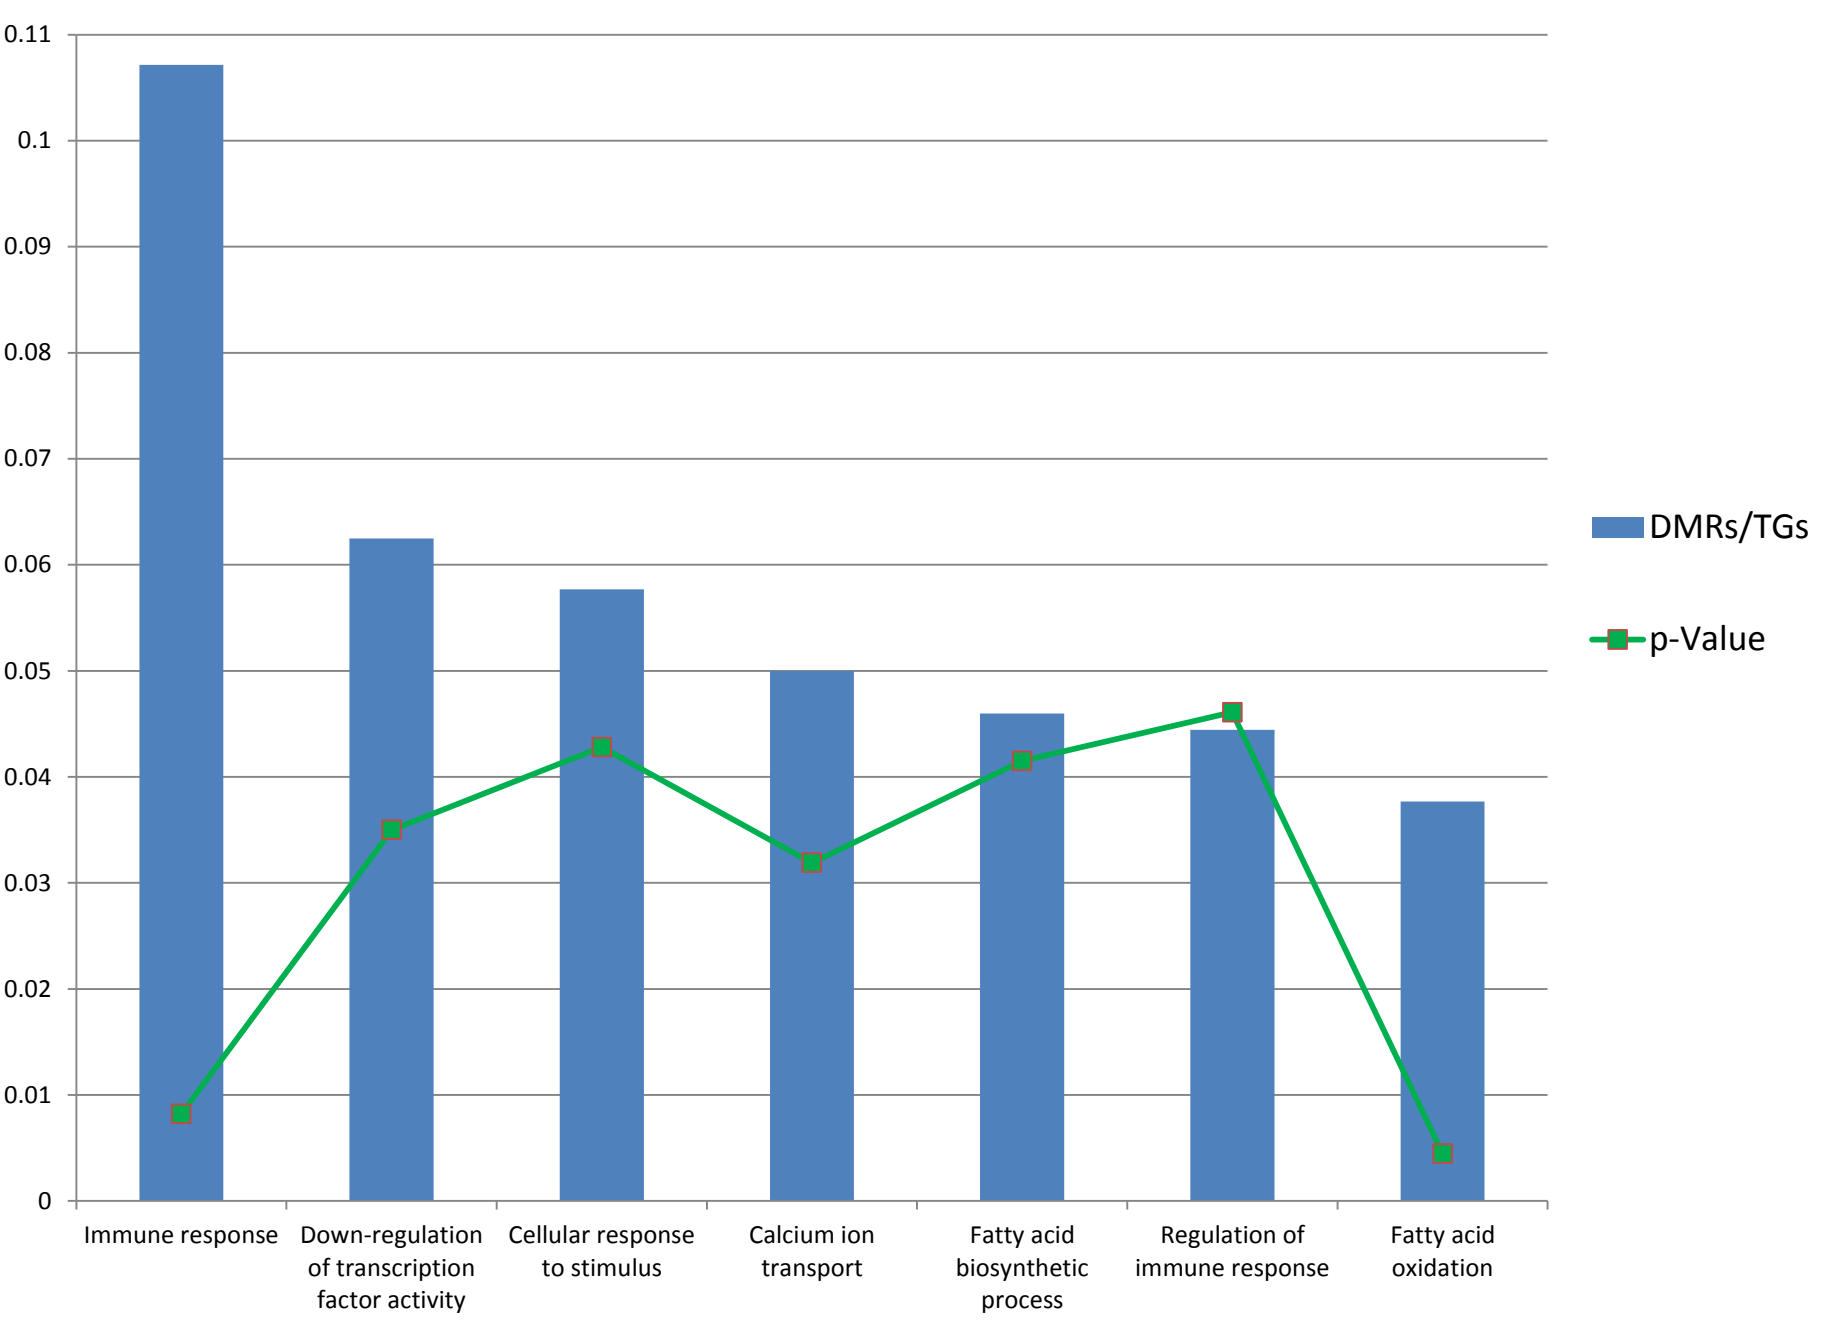**b**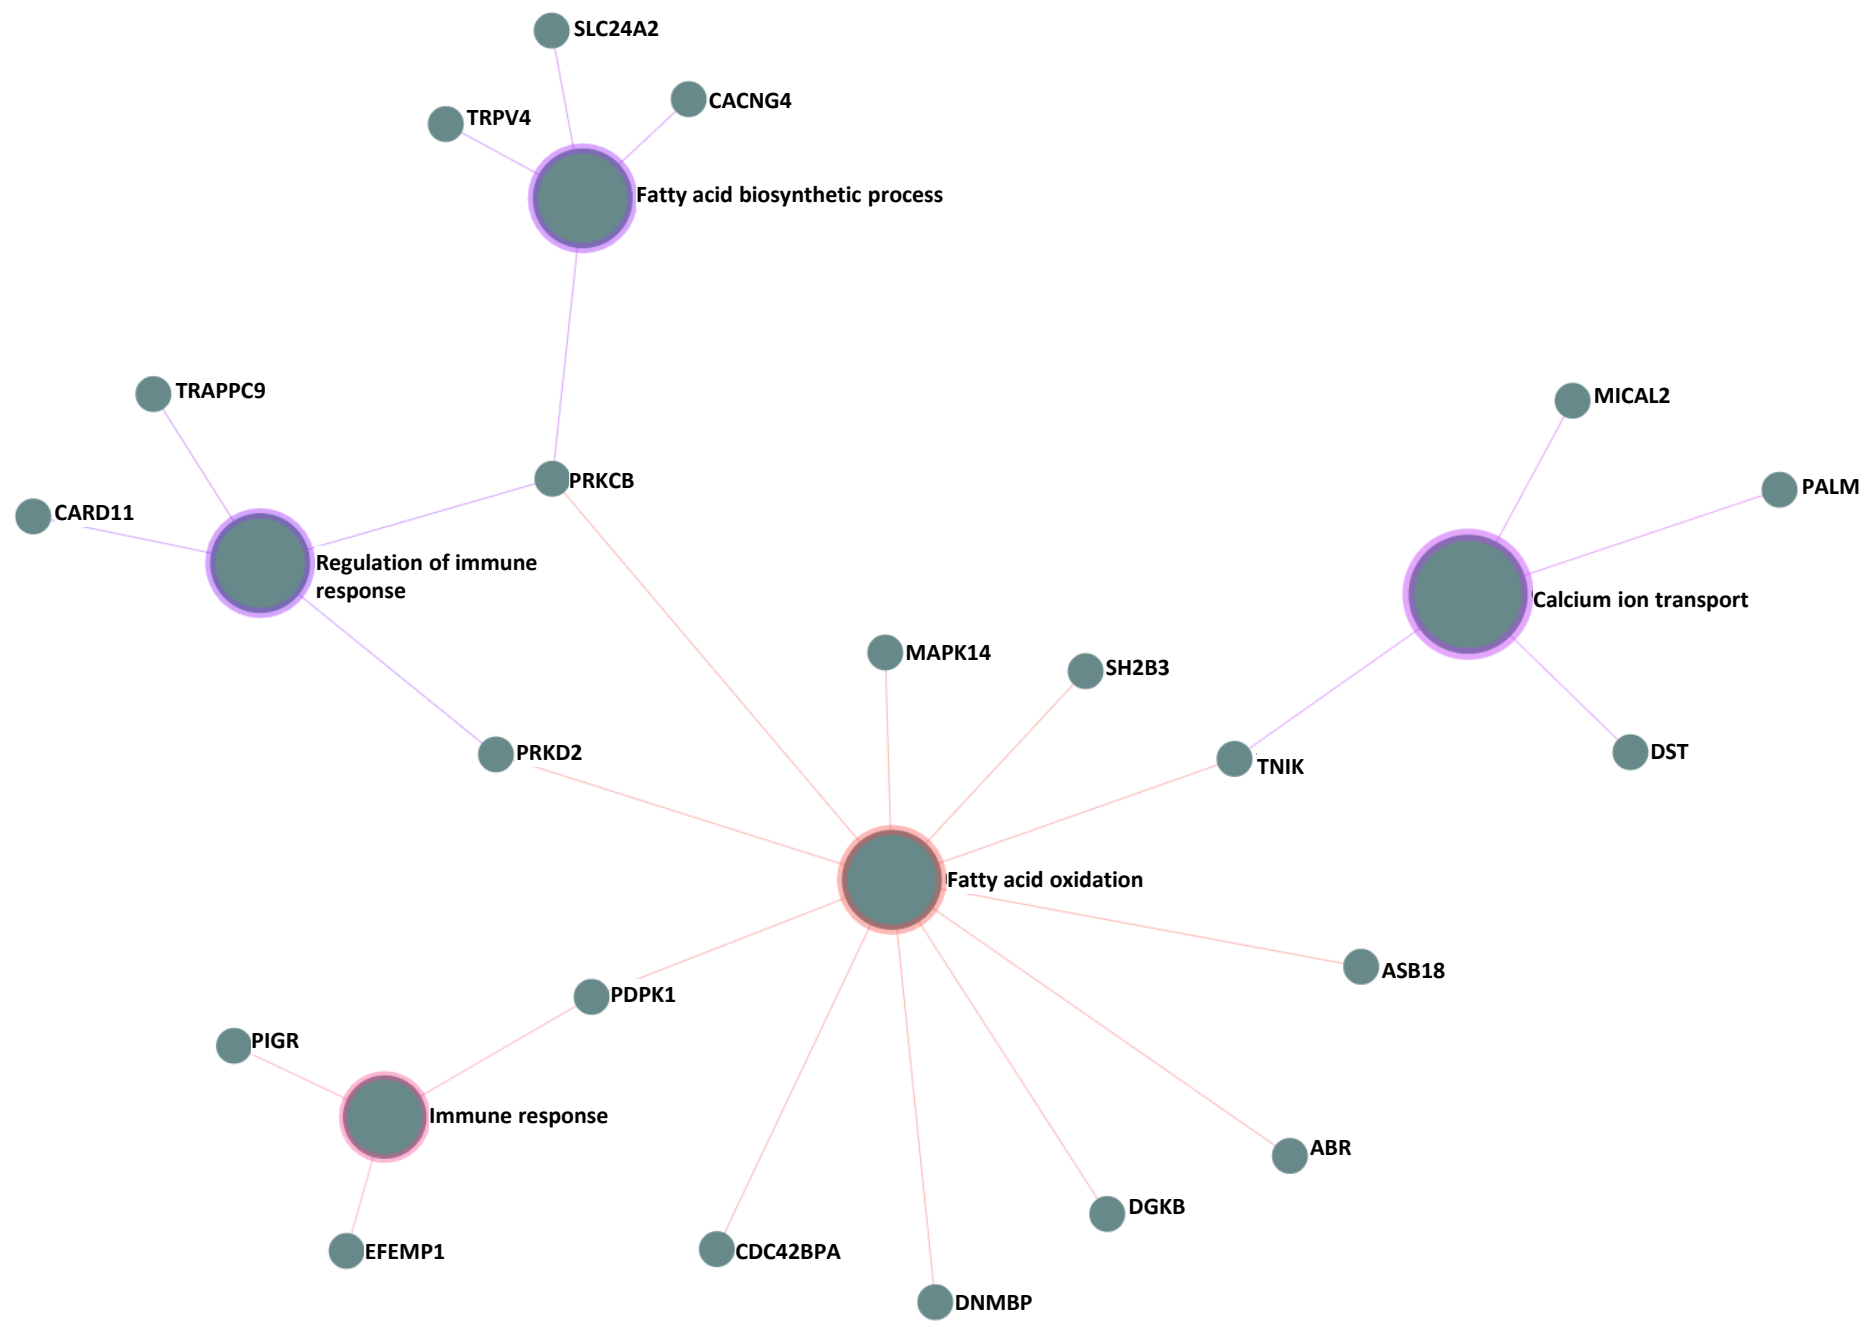

**Supplemental figure 1. Functional annotation of mid postpartum (Mpp) specific DMRs.** (a) Top biological processes enriched with the DMRs found in the Mpp group. (b) Biological processes network associated with DMRs from the Mpp group and their interaction. DMRs/TGs: Ratio of differentially methylated regions over the number of genes in the pathway. Pathways shown have p-values < 0.05.

**a**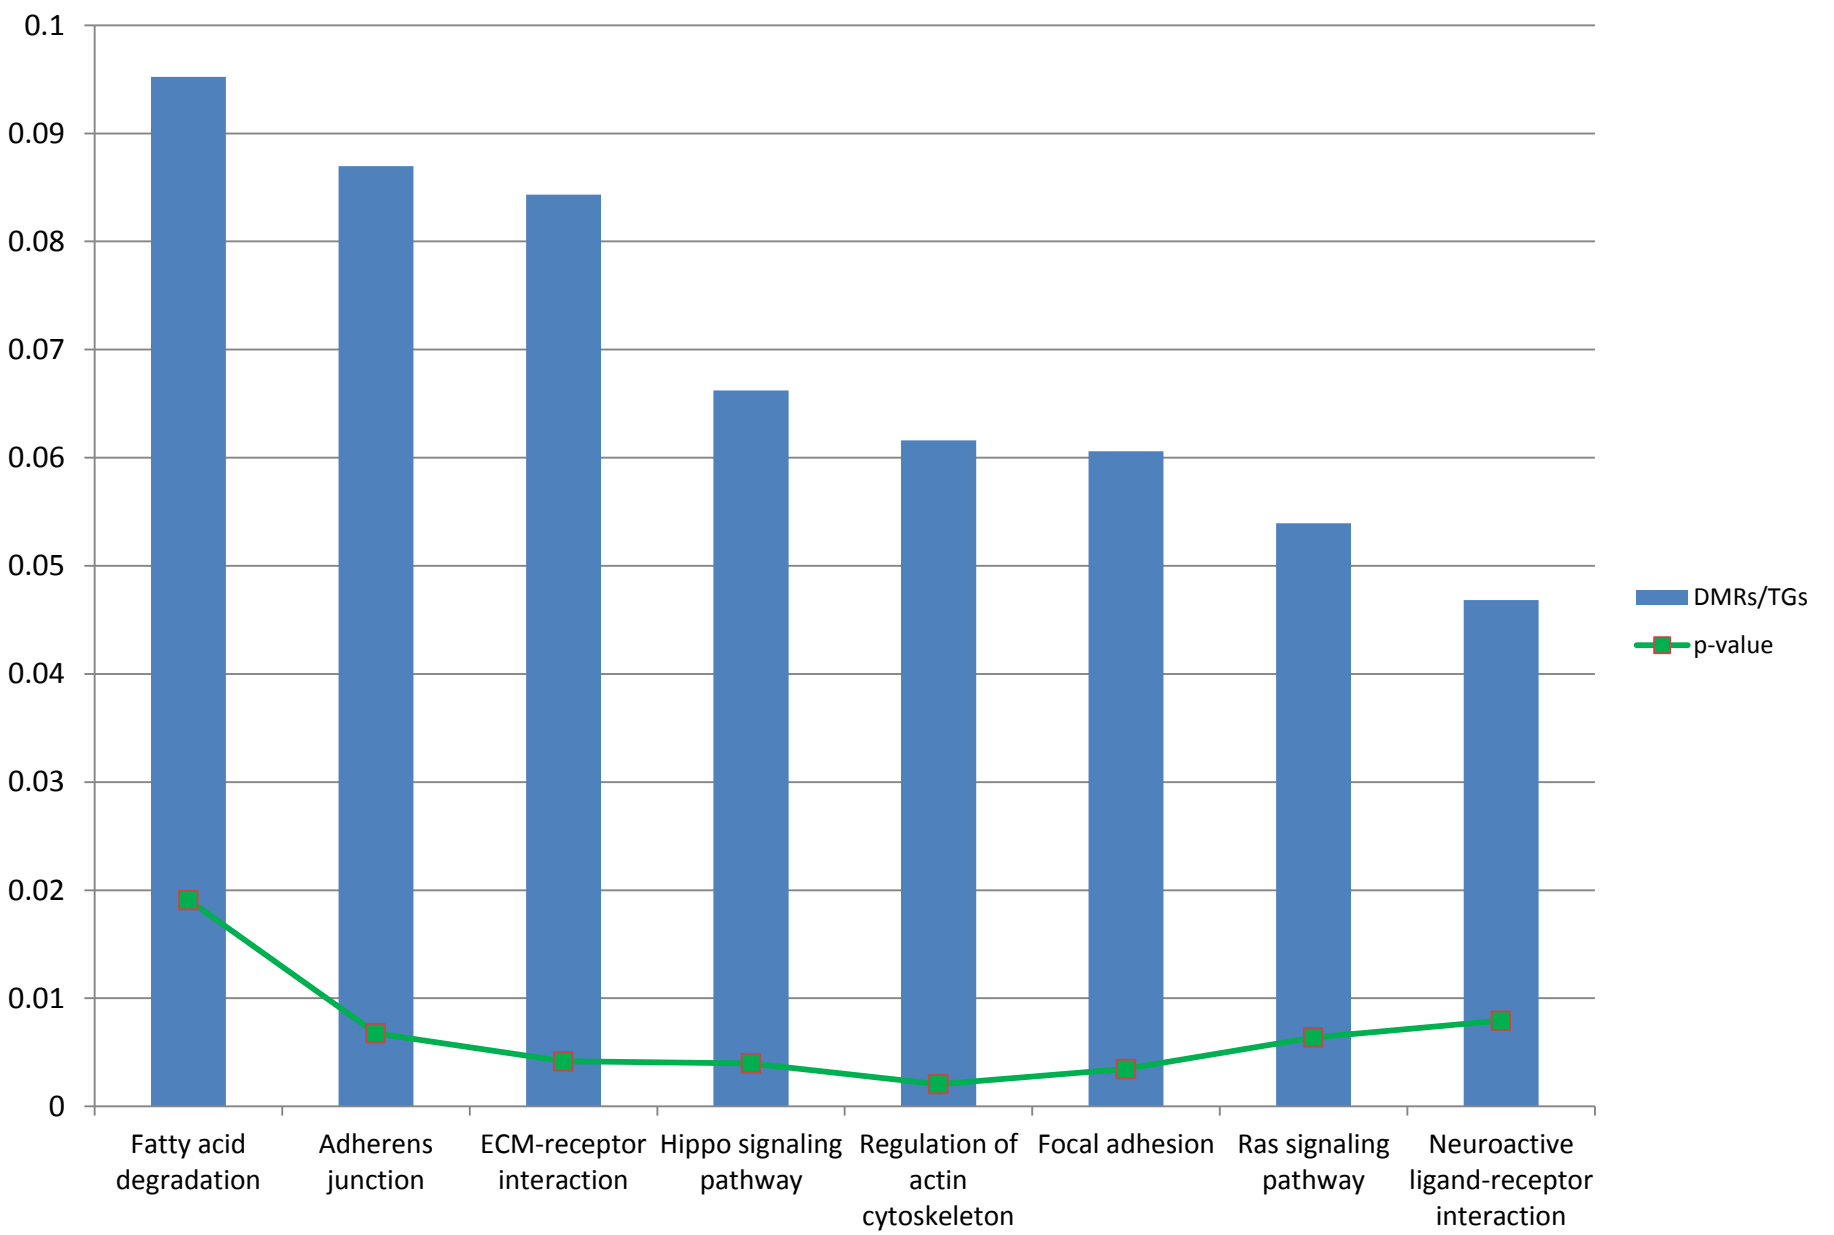**b**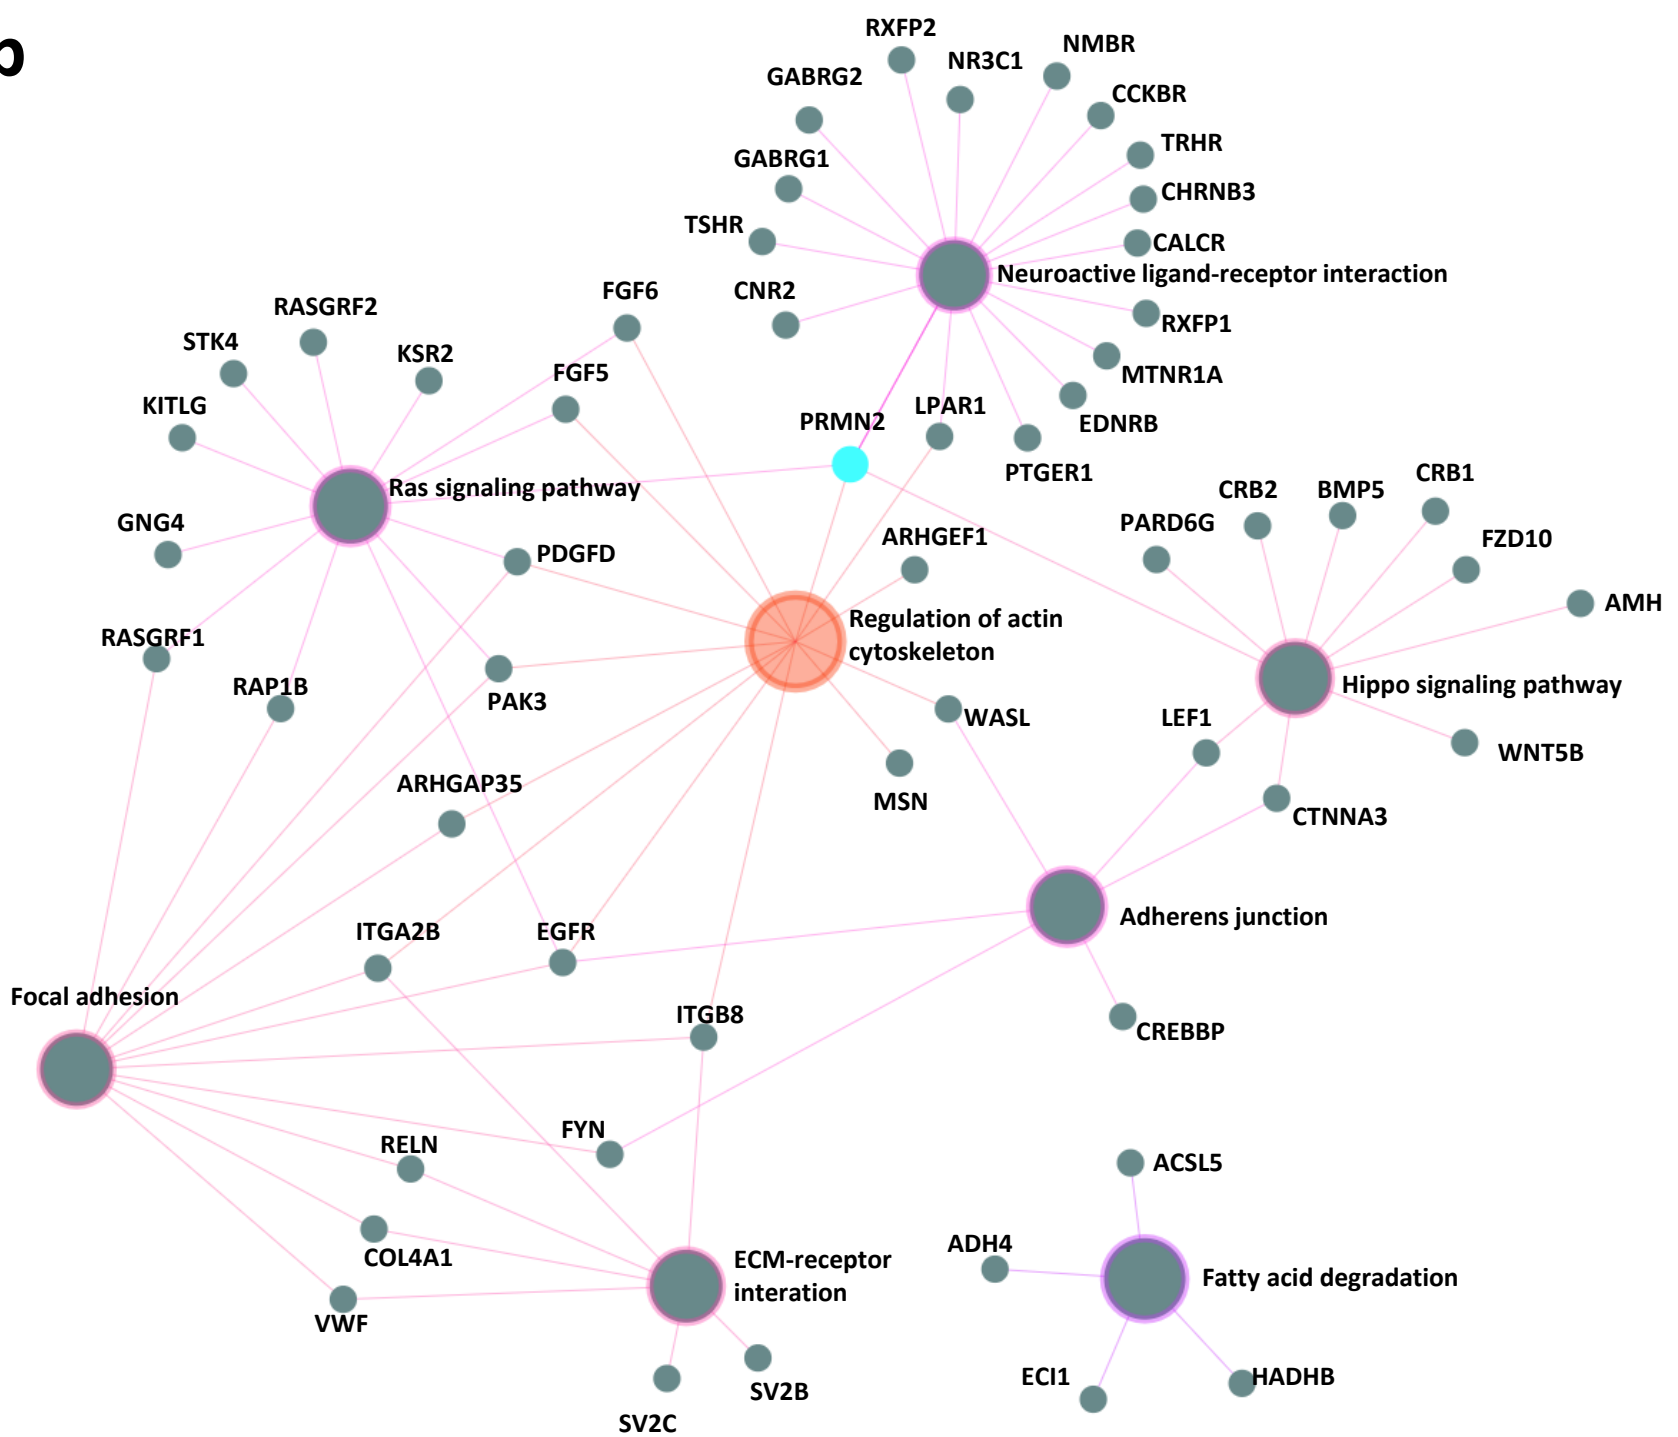

**Supplemental figure 2. Functional annotation of cyclic heifer (CH) specific DMRs.** (a) Top enriched KEGG pathways associated with the DMRs found in the CH group. (b) KEGG pathway network association with DMRs from the CH group and their interaction. DMRs/TGs: Ratio of differentially methylated regions over the number of genes in the pathway. Pathways shown have p-values < 0.05.
